# Supplementary material
Source: publisher figshare collection journal article supplement (https://tandf.figshare.com/articles/dataset/_/11790999)
Supplement: Supplementary file 1 [file 1]

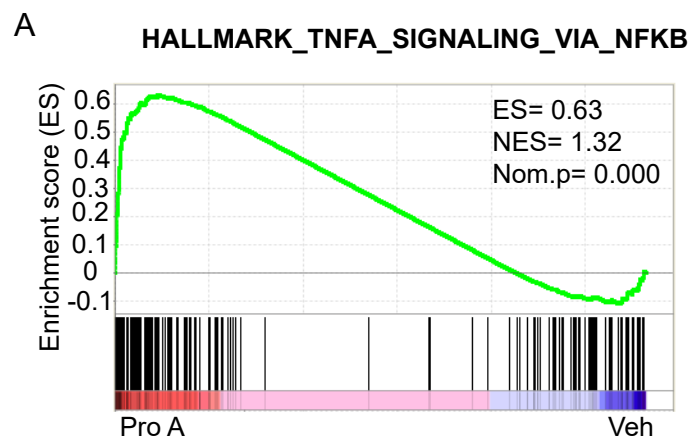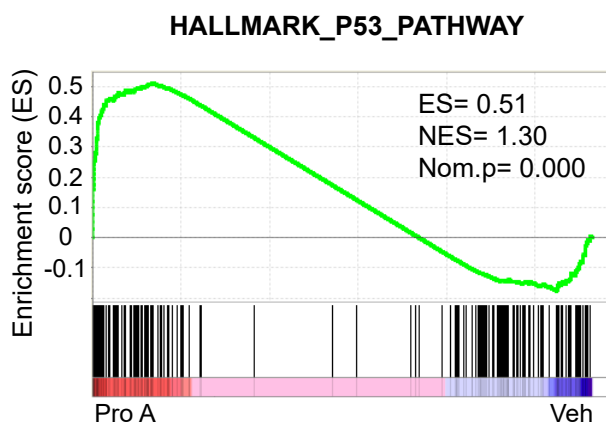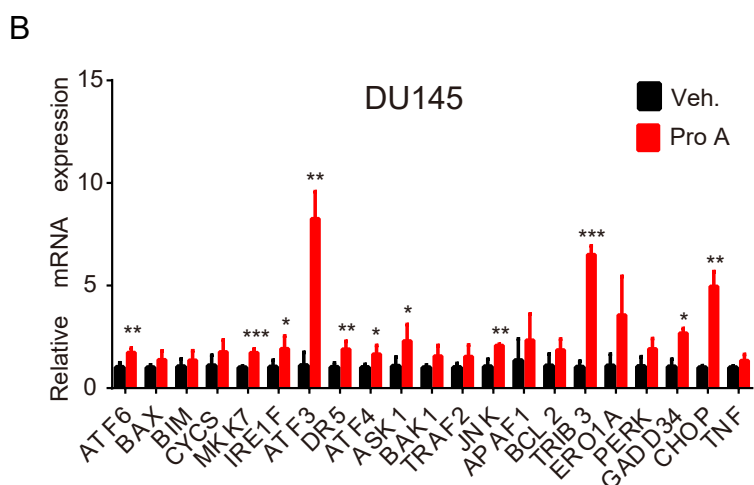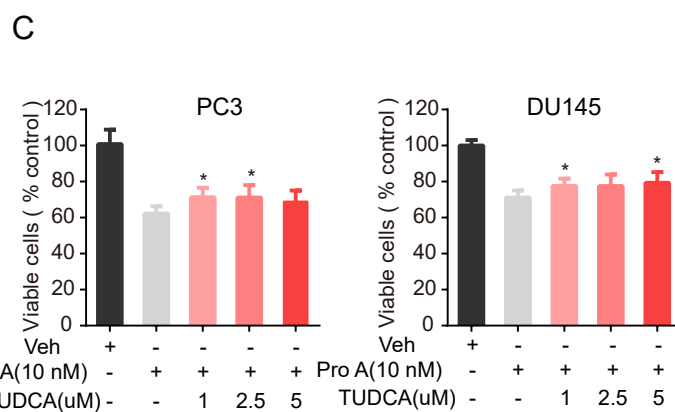

#### Supplementary figure legend

(A) GSEA analysis of RNA-seq data indicates increased expression of genes in the TNF and P53 signaling. (B) Realtime-PCR demonstrated the activation of UPR signalling in DU145 cell. (C) PC3 and DU145 cells were incubated with 10nM Pro A in the presence or absence of increasing concentrations of TUDCA. Cell viability was measured by the CCK8 assay and results are reported as percent relative to untreated cells.
